# Supplementary material for: Hemin-functionalized MoS2 nanosheets: enhanced peroxidase-like catalytic activity with a steady state in aqueous solution
Source: Royal Society of Chemistry journal article supplement (doi:10.1039/c4ra01746c), 2014-01-01
Supplement: c4ra01746c1.pdf [file c4ra01746c1.pdf]

**Electronic Supplementary Information**  
*for*

**Hemin functionalized MoS<sub>2</sub> nanosheets: enhanced peroxidase-like catalytic activity with a steady state in aqueous solution**

Bang Lin Li,<sup>a</sup> Hong Qun Luo,<sup>a</sup> Jing Lei Lei<sup>b\*</sup> and Nian Bing Li<sup>a\*</sup>

<sup>a</sup> *Key Laboratory of Eco-environments in Three Gorges Reservoir Region (Ministry of Education), School of Chemistry and Chemical Engineering, Southwest University, Chongqing 400715, P.R. China. Fax: +86-23-68253237. Tel: +86-23-68253237. E-mail: linb@swu.edu.cn (N. B. Li).*

<sup>b</sup> *School of Chemistry and Chemical Engineering, Chongqing University, Chongqing 400044, P.R. China. E-mail: jllei@cqu.edu.cn (J.L. Lei).*

## 1. Comparison of catalytic activities of hemin and hemin/MoS<sub>2</sub>-NSs

The control experiment used to explore the catalytic activity of hemin to 3, 3', 5, 5'-tetramethylbenzidine (TMB) oxidation in the presence of H<sub>2</sub>O<sub>2</sub> was carried out. However, it can be seen from Fig. S1A that hemin molecules show rapid aggregation in aqueous solution, making it hard to explore their catalytic activities in aqueous solution. Furthermore, hemin can be dissolved in 5% ethanol solution with satisfying result. In order to compare the catalytic activities of hemin and hemin/MoS<sub>2</sub>-NSs, the spectra of TMB reaction solutions (5% ethanol) in the presence of hemin (curve b, Fig. S1B) and hemin/MoS<sub>2</sub>-NSs (curve c, Fig. S1B) were recorded after reaction for 10 min. It was found that when compared to pure hemin, as-prepared hemin/MoS<sub>2</sub>-NSs exhibit higher peroxidase-like activity to TMB oxidation in the presence of H<sub>2</sub>O<sub>2</sub>.

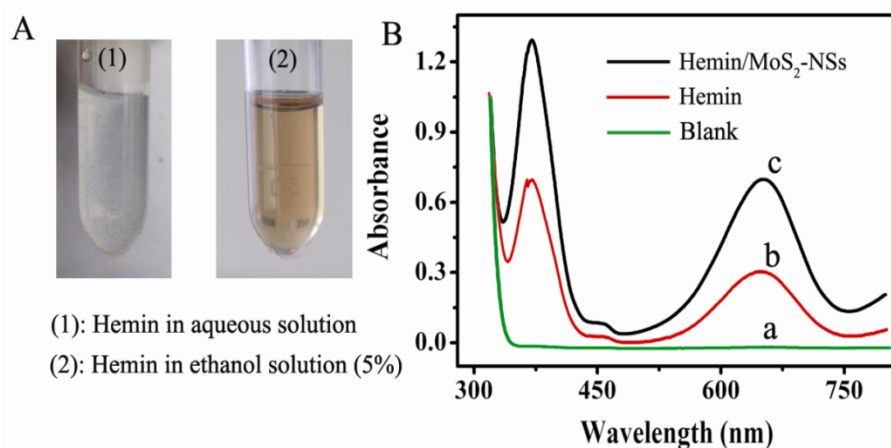

Fig. S1 (A) photographs of hemin dissolved in aqueous solution and 5% ethanol solution. (B) UV-vis absorption spectra of blank TMB reaction solutions (a), and in the presence of 12.0  $\mu\text{g mL}^{-1}$  hemin (b) or 12.0  $\mu\text{g mL}^{-1}$  hemin/MoS<sub>2</sub>-NSs (c) after reaction for 10 min. TMB reaction solution contains 2 mM H<sub>2</sub>O<sub>2</sub>, 0.5 mM TMB, BR buffer (pH 4.0), and 5% ethanol.

## 2. Calculation of Michaelis-Menten constant

The Michaelis-Menten constant was calculated using Lineweaver-Burk plots of the double reciprocal of the Michaelis-Menten equation,  $1/v = K_m/V_m (1/[S] + 1/K_m)$ , where  $v$  is the initial velocity,  $V_m$  represents the maximal reaction velocity,  $[S]$  corresponds to the concentration of substrate, and  $K_m$  is the Michaelis-Menten constant.

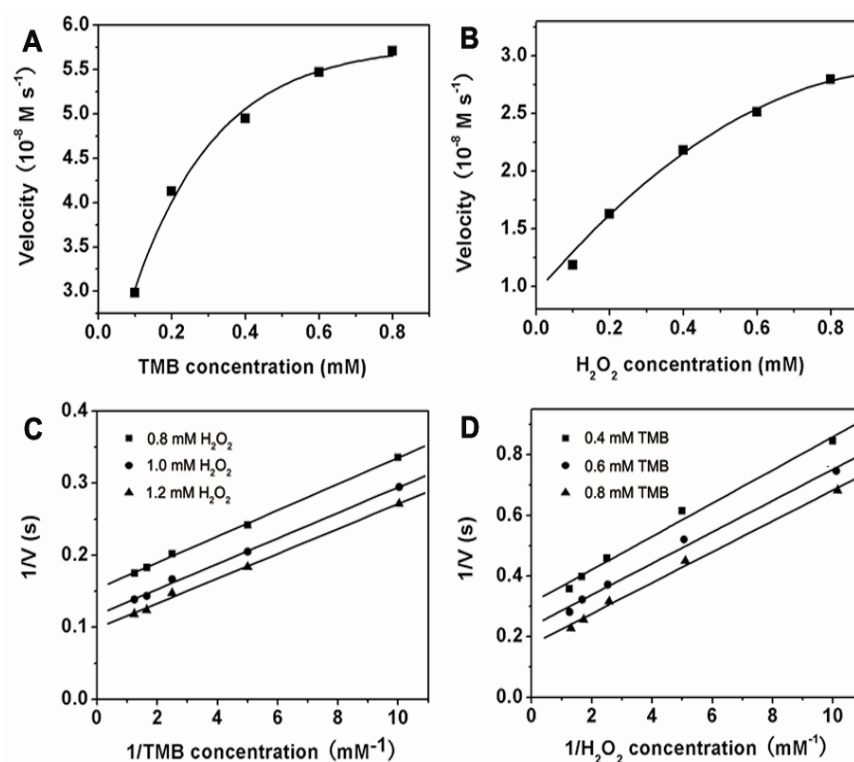

Fig. S2 Steady-state kinetic assay of hemin/MoS<sub>2</sub>-NSs artificial enzyme. The velocity of the reaction was measured using 20  $\mu\text{g mL}^{-1}$  hemin/MoS<sub>2</sub>-NSs in BR buffer solution (pH 4.0) at 25°C. (A) The concentration of H<sub>2</sub>O<sub>2</sub> was 0.8 mM and TMB concentration was varied. (B) The concentration of TMB was 0.4 mM and H<sub>2</sub>O<sub>2</sub> concentration was varied. (C, D) Double-reciprocal plots of activity of hemin/MoS<sub>2</sub>-NSs at a fixed concentration of one substrate versus different concentrations of the second substrate for H<sub>2</sub>O<sub>2</sub> or TMB.

Table S1. A list of a series of H<sub>2</sub>O<sub>2</sub> sensors based on nanomaterials owning peroxidase-like activity.

| Catalyst                                       | Method            | Linear range<br>( $\mu\text{M}$ ) | Detection limit<br>( $\mu\text{M}$ ) | Ref.      |
|------------------------------------------------|-------------------|-----------------------------------|--------------------------------------|-----------|
| g-C <sub>3</sub> N <sub>4</sub> <sup>(1)</sup> | Spectrophotometry | 5 – 30                            | 0.9                                  | [S1]      |
| WC NRs <sup>(2)</sup>                          | Spectrophotometry | 0.2 – 80                          | 0.06                                 | [S2]      |
| GO-COOH <sup>(3)</sup>                         | Spectrophotometry | 0.05 – 1                          | 0.05                                 | [S3]      |
| GO-Fe <sub>3</sub> O <sub>4</sub>              | Spectrophotometry | 1 – 50                            | 0.32                                 | [S4]      |
| rGO <sup>(4)</sup> -CFs <sup>(5)</sup>         | Spectrophotometry | 2 – 100                           | 0.3                                  | [S5]      |
| Hemin-SWCNT <sup>(6)</sup>                     | Spectrophotometry | 0.5 – 200                         | 0.2                                  | [S6]      |
| Hemin@MOF <sup>(7)</sup>                       | Spectrophotometry | 5 – 200                           | 2                                    | [S7]      |
| Hemin-GNs <sup>(8)</sup>                       | Spectrophotometry | 0.05 – 500                        | 0.03                                 | [S8]      |
| Hemin-GNs                                      | Electroanalysis   | 0.5 – 400                         | 0.2                                  | [S8]      |
| Hemin-OMC <sup>(9)</sup>                       | Electroanalysis   | 2 – 250                           | 0.3                                  | [S9]      |
| Hemin/MoS <sub>2</sub> -NSs                    | Spectrophotometry | 0.2 – 4                           | 0.043                                | This work |

<sup>(1)</sup> g-C<sub>3</sub>N<sub>4</sub>: graphite-like carbon nitride; <sup>(2)</sup> WC NRs: tungsten carbide nanorods; <sup>(3)</sup> GO-COOH: carbon-modified graphene oxide; <sup>(4)</sup> rGO: reduced graphene oxide; <sup>(5)</sup> CFs: CoFe<sub>2</sub>O<sub>4</sub> ferrite nanocubes; <sup>(6)</sup> SWCNT: single-walled carbon nanotubes; <sup>(7)</sup> MOF: metal-organic framework; <sup>(8)</sup> GNs: graphene nanosheets; <sup>(9)</sup> OMC: ordered mesoporous carbon

Table S2. Influence of foreign substances on the detection of 2.0  $\mu\text{M}$   $\text{H}_2\text{O}_2$  using the developed sensor.

| Foreign substance            | Concentration<br>(mM) | Chang in absorption signal<br>(%) <sup>a</sup> |
|------------------------------|-----------------------|------------------------------------------------|
| KCl                          | 500                   | -4.7                                           |
| NaCl                         | 500                   | -5.7                                           |
| CaCl <sub>2</sub>            | 100                   | -5.6                                           |
| Dopamine                     | 20                    | -5.6                                           |
| Uric acid                    | 20                    | -3.3                                           |
| Glucose                      | 20                    | -6.3                                           |
| Cysteine                     | 5                     | -3.8                                           |
| Ascorbic acid                | 5                     | -5.8                                           |
| $\text{ClO}^-$               | 0.1                   | +1.7                                           |
| $\text{Cr}_2\text{O}_7^{2-}$ | 0.1                   | +3.3                                           |

<sup>a</sup> The average value of five experiments

## References

- S1. T. Lin, L. Zhong, J. Wang, L. Guo, H. Wu, Q. Guo, F. Fu and G. Chen, *Biosens. Bioelectron.*, 2014, **59**, 89-93.
- S2. N. Li, Y. Yan, B. Y. Xia, J. Y. Wang and X. Wang, *Biosens. Bioelectron.*, 2014, **54**, 521-527.
- S3. Y. Song, K. Qu, C. Zhao, J. Ren and X. Qu, *Adv. Mater.*, 2010, **22**, 2206-2210.
- S4. Y. L. Dong, H. G. Zhang, Z. U. Rahman, L. Su, X. J. Chen, J. Hu and X. G. Chen, *Nanoscale*, 2012, **4**, 3969-3976.
- S5. J. Hao, Z. Zhang, W. Yang, B. Lu, X. Ke, B. Zhang and J. Tang, *J. Mater. Chem. A*, 2013, **1**, 4352-4357.
- S6. Y. Zhang, C. Xu and B. Li, *RSC Advances*, 2013, **3**, 6044-6050.
- S7. F. X. Qin, S. Y. Jia, F. F. Wang, S. H. Wu, J. Song and Y. Liu, *Catal. Sci. Technol.*, 2013, **3**, 2761-2768.
- S8. Y. Guo, J. Li and S. Dong, *Sens. Actuators, B*, 2011, **160**, 295-300.
- S9. H. Cao, X. Sun, Y. Zhang, C. Hu and N. Jia, *Anal. Methods*, 2012, **4**, 2412-2416.
